# Supplementary material for: Frequency, impact and a preclinical study of novel ERBB gene family mutations in HER2-positive breast cancer
Source: PubMed Central journal article supplement — Ther Adv Med Oncol. 2018 Jul 13;10:1758835918778297. doi: 10.1177/1758835918778297 (PMC6047239; doi:10.1177/1758835918778297), 2018-07-13
Supplement: Supplementary_material.pdf [file Supplementary_material.pdf]

Supplementary Table 1 The mutations in EGFR, ERBB2, ERBB3, and ERBB4 assayed in our Agena study.

| EGFR    | HER2   | HER3  | HER4    |
|---------|--------|-------|---------|
| A839T   | D769H  | A232V | D595GV  |
| D761NY  | G776S  | D297Y | E810K   |
| E709AVG | G776V  | E928G | E872K   |
| E709KQ  | H878Y  | G284R | E872V   |
| E884K   | L755S  | G325R | E874X   |
| G719AD  | P1119S | P262H | E934K   |
| G719CSR | S310FY | Q809R | G599W   |
| G863D   | V777A  | S505F | G936R   |
| H870R   | V777LM | S846I | K935E   |
| K846R   | V842I  | T355A | K935TRI |
| L858M   |        | T355I | N861Y   |
| L858R   |        | T389K | P854Q   |
| L861QR  |        | V104M | R782Q   |
| N700D   |        | V714M | R81X    |
| R836C   |        |       | S303YF  |
| S720TP  |        |       | T926M   |
| T273S   |        |       | V348ML  |
| T783A   |        |       | V721I   |
| V398I   |        |       |         |
| V689M   |        |       |         |
| V769LM  |        |       |         |

Supplementary Table 2 Primers used to perform site-directed mutagenesis to create ERBB4 S303F and V721I

| Gene (Human) | Primer Sequence (Forward/Reverse)                | Final concentration (pmol) |
|--------------|--------------------------------------------------|----------------------------|
| ERBB4-S303F  | 5' - ggcacgcacacaaaaactggaatctaccacaaagttat - 3' | 1.25                       |
|              | 3' - ataactttgtgtagattccagttttgtgtgcgttgcc - 5'  | 1.25                       |
| ERBB4-V721I  | 5'-gaaactgagctgaagaggataaaagtcccttgctcag-3'      | 1.25                       |
|              | 3'-ctgagccaaggacttttatcctcttcagctcagtttc-5'      | 1.25                       |

Supplementary Table 3: Correlation between ERBB family mutations and clinical/pathological features at diagnosis/surgery as calculated by Fisher's Exact Test or Chi-square test as appropriate. ER = estrogen receptor; PR = progesterone receptor; LVI = lymphovascular invasion; BMI = body mass index; WT = wild type

| Variable            |            | WT<br>Patients<br>n (%) | MUT<br>Patients<br>n (%) | P value |
|---------------------|------------|-------------------------|--------------------------|---------|
| ER Status           | Negative   | 70 (35.7)               | 6 (46.2)                 | 0.5536  |
|                     | Positive   | 126 (64.3)              | 7 (53.8)                 |         |
| PR status           | Negative   | 75 (72.2)               | 7 (77.8)                 | 1.000   |
|                     | Positive   | 29 (27.8)               | 2 (22.2)                 |         |
| LVI                 | Negative   | 64 (36.8)               | 6 (42.9)                 | 0.7751  |
|                     | Positive   | 110 (63.2)              | 8 (57.1)                 |         |
| Grade               | Grade 1    | 4 (2.1)                 | 1 (6.7)                  | 0.4033  |
|                     | Grade 2    | 60 (31.8)               | 6 (40.0)                 |         |
|                     | Grade 3    | 125 (66.1)              | 8 (53.3)                 |         |
| BMI                 | Healthy    | 21 (32.3)               | 1 (14.3)                 | 0.4270  |
|                     | Overweight | 44 (67.7)               | 6 (85.7)                 |         |
| T Stage             | T1         | 59 (33.3)               | 3 (21.4)                 | 0.6969  |
|                     | T2         | 94 (53.1)               | 10 (71.4)                |         |
|                     | T3         | 24 (13.6)               | 1 (7.2)                  |         |
| N stage             | N0         | 85 (46.4)               | 6 (42.8)                 | 0.7582  |
|                     | N1         | 58 (31.8)               | 4 (28.6)                 |         |
|                     | N2         | 28 (15.3)               | 2 (14.3)                 |         |
|                     | N3         | 12 (6.5)                | 2 (14.3)                 |         |
| Age at<br>Diagnosis | ≤ 35 years | 14 (7.0)                | 0 (0.0)                  | 0.6053  |
|                     | ≥ 36 years | 186 (93.0)              | 15 (100.0)               |         |
|                     | ≤ 50 years | 103 (49.8)              | 9 (60.0)                 | 0.5880  |
|                     | ≥ 51 years | 104 (50.2)              | 6 (40.0)                 |         |

Supplementary Table 4: p-values for the signalling differences observed between HCC1569 ERBB4 V721I- or ERBB4 S303F- (transfected), or BT474 ERBB4 V721I or HCC1954 ERBB4 V721I HER2-positive cell lines relative to matched cells transfected with WT ERBB4. Signalling differences were determined by RPPA. p-values were calculated using the Student's t-test (2-tailed with equal variance).

| Cell Line (vs matched WT)    | Protein                | P-value | Cell Line (vs matched WT) | Protein              | P-value |
|------------------------------|------------------------|---------|---------------------------|----------------------|---------|
| <b>HER Family Signalling</b> |                        |         | <b>MAPK Signalling</b>    |                      |         |
| BT474 V721I                  | EGFR (Y1173)           | 0.002   | HCC1569 S303F             | Total MEK1           | 0.001   |
| HCC1954 V721I                | Total HER2             | 0.05    | HCC1569 V721I             | MEK1/2 (S217/221)    | 0.02    |
| HCC1569 V721I                | HER3 (Y1289)           | 0.05    | HCC1954 V721I             | MEK1/2 (S217/221)    | 0.02    |
| HCC1569 S303F                | HER3 (Y1289)           | 0.04    | HCC1569 V721I             | MAPK 1/2 (Y202/T204) | 0.01    |
| HCC1954 V721I                | HER3 (Y1289)           | 0.01    | HCC1569 S303F             | MAPK 1/2 (T202/Y204) | 0.02    |
| HCC1569 V721I                | Total HER4             | 0.0001  | BT474 V721I               | MAPK 1/2 (T202/Y204) | 0.01    |
| HCC1954 V721I                | Total HER4             | 0.002   |                           |                      |         |
| <b>PI3K Signalling</b>       |                        |         |                           |                      |         |
| BT474 V721I                  | Total Akt              | 0.001   |                           |                      |         |
| HCC1569 V721I                | Akt (T308)             | 0.04    |                           |                      |         |
| HCC1569 S303F                | Akt (T308)             | 0.03    |                           |                      |         |
| HCC1954 V721I                | Akt (T308)             | 0.02    |                           |                      |         |
| HCC1954 V721I                | Akt (S473)             | 0.03    |                           |                      |         |
| BT474 V721I                  | mTOR (S2448)           | 0.01    |                           |                      |         |
| HCC1569 V721I                | P70-S6 Kinase 1 (T389) | 0.03    |                           |                      |         |
| HCC1569 S303F                | P70-S6 Kinase 1 (T389) | 0.01    |                           |                      |         |
| HCC1954 V721I                | P70-S6 Kinase 1 (T389) | 0.04    |                           |                      |         |

Supplementary Table 5: Correlation between ERBB family mutations and clinical/pathological features at diagnosis/surgery as calculated by Fisher's Exact Test or Chi-square test as appropriate. ER = estrogen receptor; PR = progesterone receptor; LVI = lymphovascular invasion; BMI = body mass index; WT = wild type

| Variable            |            | WT<br>Patients<br>n (%) | MUT<br>Patients<br>n (%) | P value |
|---------------------|------------|-------------------------|--------------------------|---------|
| ER Status           | Negative   | 70 (35.7)               | 6 (46.2)                 | 0.5536  |
|                     | Positive   | 126 (64.3)              | 7 (53.8)                 |         |
| PR status           | Negative   | 75 (72.2)               | 7 (77.8)                 | 1.000   |
|                     | Positive   | 29 (27.8)               | 2 (22.2)                 |         |
| LVI                 | Negative   | 64 (36.8)               | 6 (42.9)                 | 0.7751  |
|                     | Positive   | 110 (63.2)              | 8 (57.1)                 |         |
| Grade               | Grade 1    | 4 (2.1)                 | 1 (6.7)                  | 0.4033  |
|                     | Grade 2    | 60 (31.8)               | 6 (40.0)                 |         |
|                     | Grade 3    | 125 (66.1)              | 8 (53.3)                 |         |
| BMI                 | Healthy    | 21 (32.3)               | 1 (14.3)                 | 0.4270  |
|                     | Overweight | 44 (67.7)               | 6 (85.7)                 |         |
| T Stage             | T1         | 59 (33.3)               | 3 (21.4)                 | 0.6969  |
|                     | T2         | 94 (53.1)               | 10 (71.4)                |         |
|                     | T3         | 24 (13.6)               | 1 (7.2)                  |         |
| N stage             | N0         | 85 (46.4)               | 6 (42.8)                 | 0.7582  |
|                     | N1         | 58 (31.8)               | 4 (28.6)                 |         |
|                     | N2         | 28 (15.3)               | 2 (14.3)                 |         |
|                     | N3         | 12 (6.5)                | 2 (14.3)                 |         |
| Age at<br>Diagnosis | ≤ 35 years | 14 (7.0)                | 0 (0.0)                  | 0.6053  |
|                     | ≥ 36 years | 186 (93.0)              | 15 (100.0)               |         |
|                     | ≤ 50 years | 103 (49.8)              | 9 (60.0)                 | 0.5880  |
|                     | ≥ 51 years | 104 (50.2)              | 6 (40.0)                 |         |

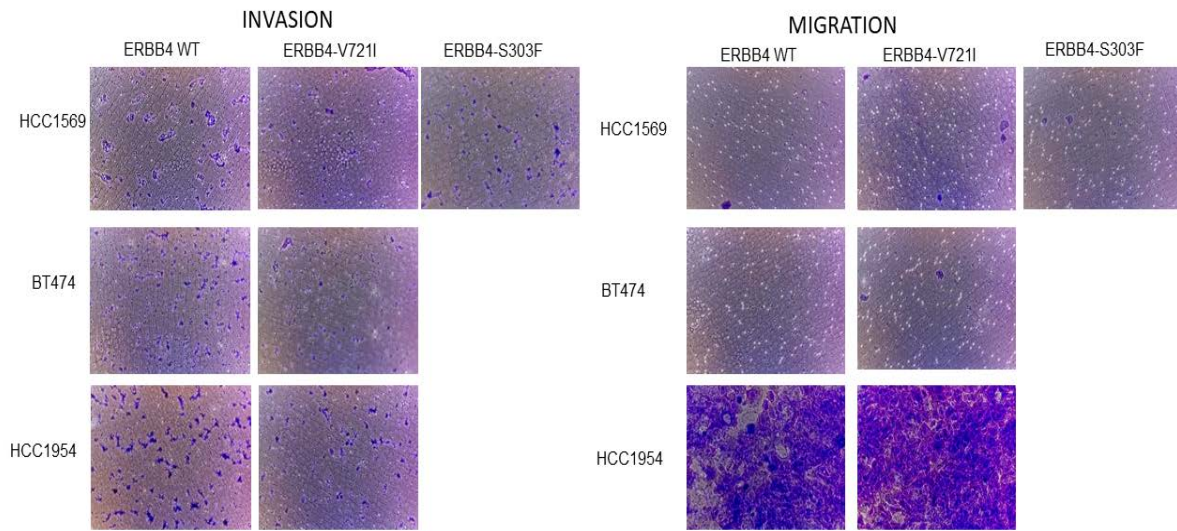

Supplementary Figure 1: The effect of the ERBB4-V721I and S303F mutations on the ability of HCC1569, BT474 and HCC1954 HER2-positive breast cancer cells to invade and migrate. We are unwilling to attempt to draw any conclusions due to the low numbers of invading/migrating cells. Photographs taken at 10X Magnification.

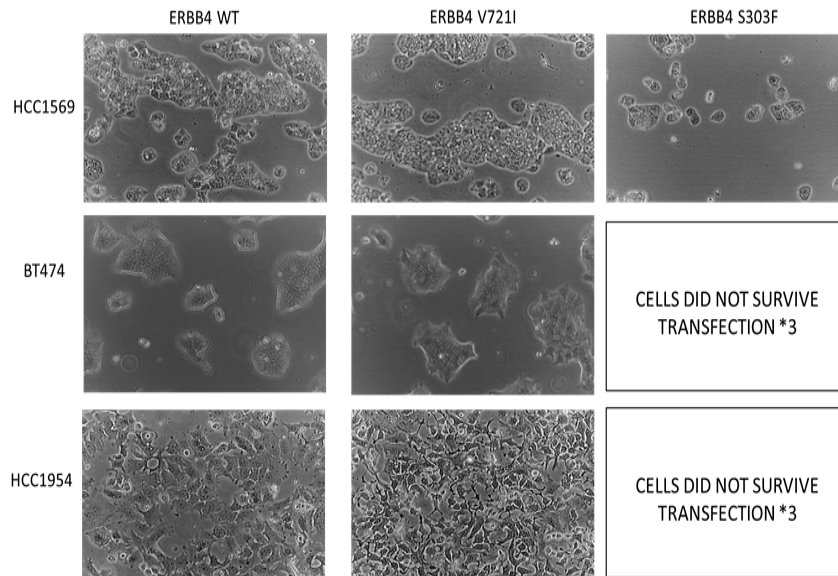

Supplementary Figure 2: The morphology of HCC1569, BT474 and HCC1954 HER2-positive breast cancer cells stably expressing ERBB4-V721I and S303F mutations. Visualised in T75 flasks at 100X with a light microscope (Nikon).

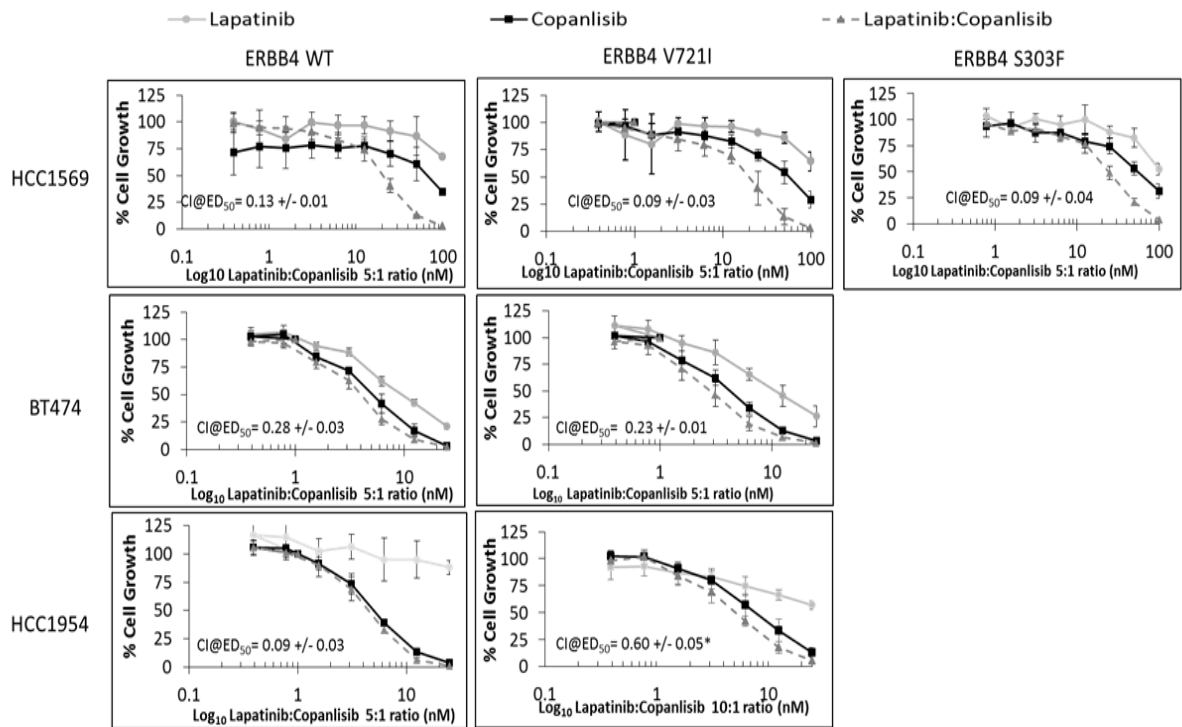

Supplementary Figure 3: Efficacy of lapatinib (○), copanlisib (■) and a combination of lapatinib and copanlisib (▲) in the HER2-positive cell lines HCC1569, BT474, and HCC1954 cell lines stably expressing ERBB4 WT, V721I or S303F. Acid phosphatase toxicity assays were used to investigate the effect of a serial dilution of the drugs on these HER2+ BCcell lines over a 5 day period and the resulting dose-response curves were analysed with Calcsyn (Biosoft). Error bars are representative of standard deviations across triplicate experiments. \*  $b = p < 0.05$  compared to cells transfected with WT ERBB4 by Student's t-test (2-tailed with equal variance). CI (Combination Index) values were calculated using Calcsyn software according to the Chou-Tallal method. A CI value of 1 denotes additivity, with a CI < 1 denoting synergy and of > 1 denoting the two drugs in combination are antagonistic. Lapatinib:Copanlisib was tested at a 5:1 ratio (top conc 500nM:100nM)

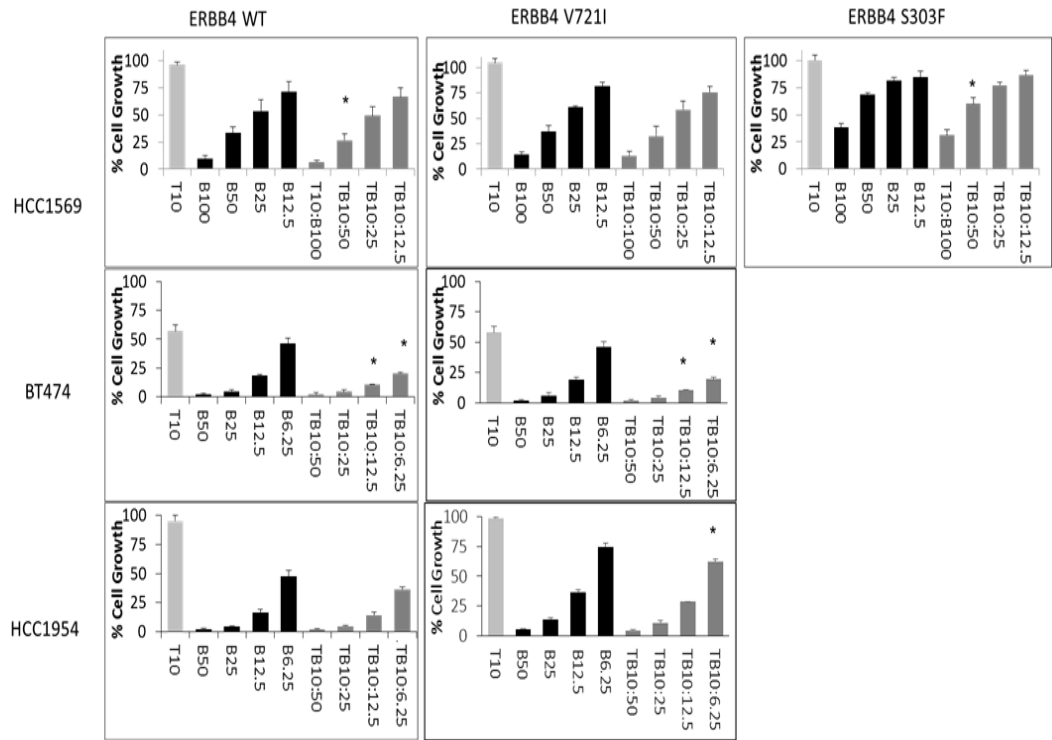

Supplementary Figure 4: The efficacy of combining trastuzumab (T) and copanlisib (B) in the HER2-positive cell lines HCC1569, BT474, and HCC1954 stably expressing ERBB4 WT, V721I, or S303F. Acid phosphatase assays were used to investigate the effect of trastuzumab, copanlisib or the combination of both cell proliferation over a 5 day period. % growth is relative to untreated controls, which were normalised to 100%. Error bars are representative of standard deviations across triplicate experiments. \* =  $p \leq 0.05$  compared to both drugs alone by the Student's t-test (2-tailed with equal variance)
